# Supplementary material for: The effect of anthropogenic emission, meteorological factors, and carbon dioxide on the surface ozone increase in China from 2008 to 2018 during the East Asia summer monsoon season
Source: Copernicus journal article supplement (doi:10.5194/acp-23-6525-2023), 2023-06-14
Supplement: Supplementary file 1 [file acp-23-6525-2023-supplement.pdf]

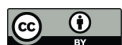

*Supplement of*

**The effect of anthropogenic emission, meteorological factors, and carbon dioxide on the surface ozone increase in China from 2008 to 2018 during the East Asia summer monsoon season**

**Danyang Ma et al.**

*Correspondence to:* Tijian Wang (tjwang@nju.edu.cn)

The copyright of individual parts of the supplement might differ from the article licence.

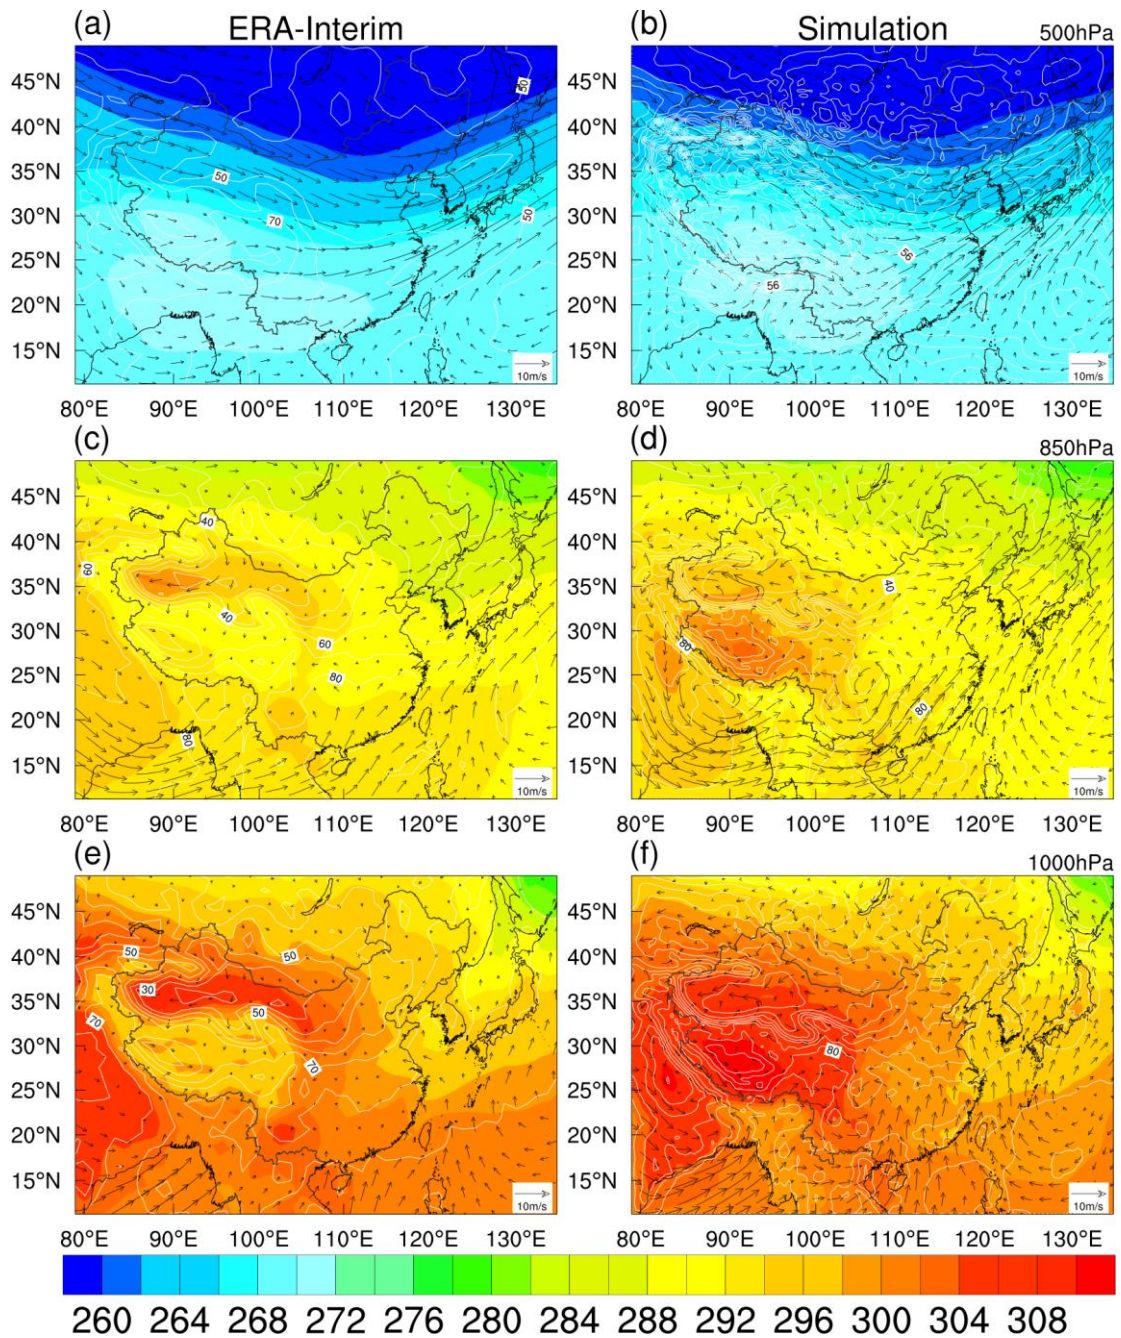

**Figure S1.** Comparisons between the simulated (a, c) and reanalysis (b, d) mean temperature (shading, units: K), wind (vectors, units: m/s), and relative humidity (contours, units: %) at 500 hPa (a, b), 850 hPa (c, d) and 1000 hPa (e, f) in 2015.

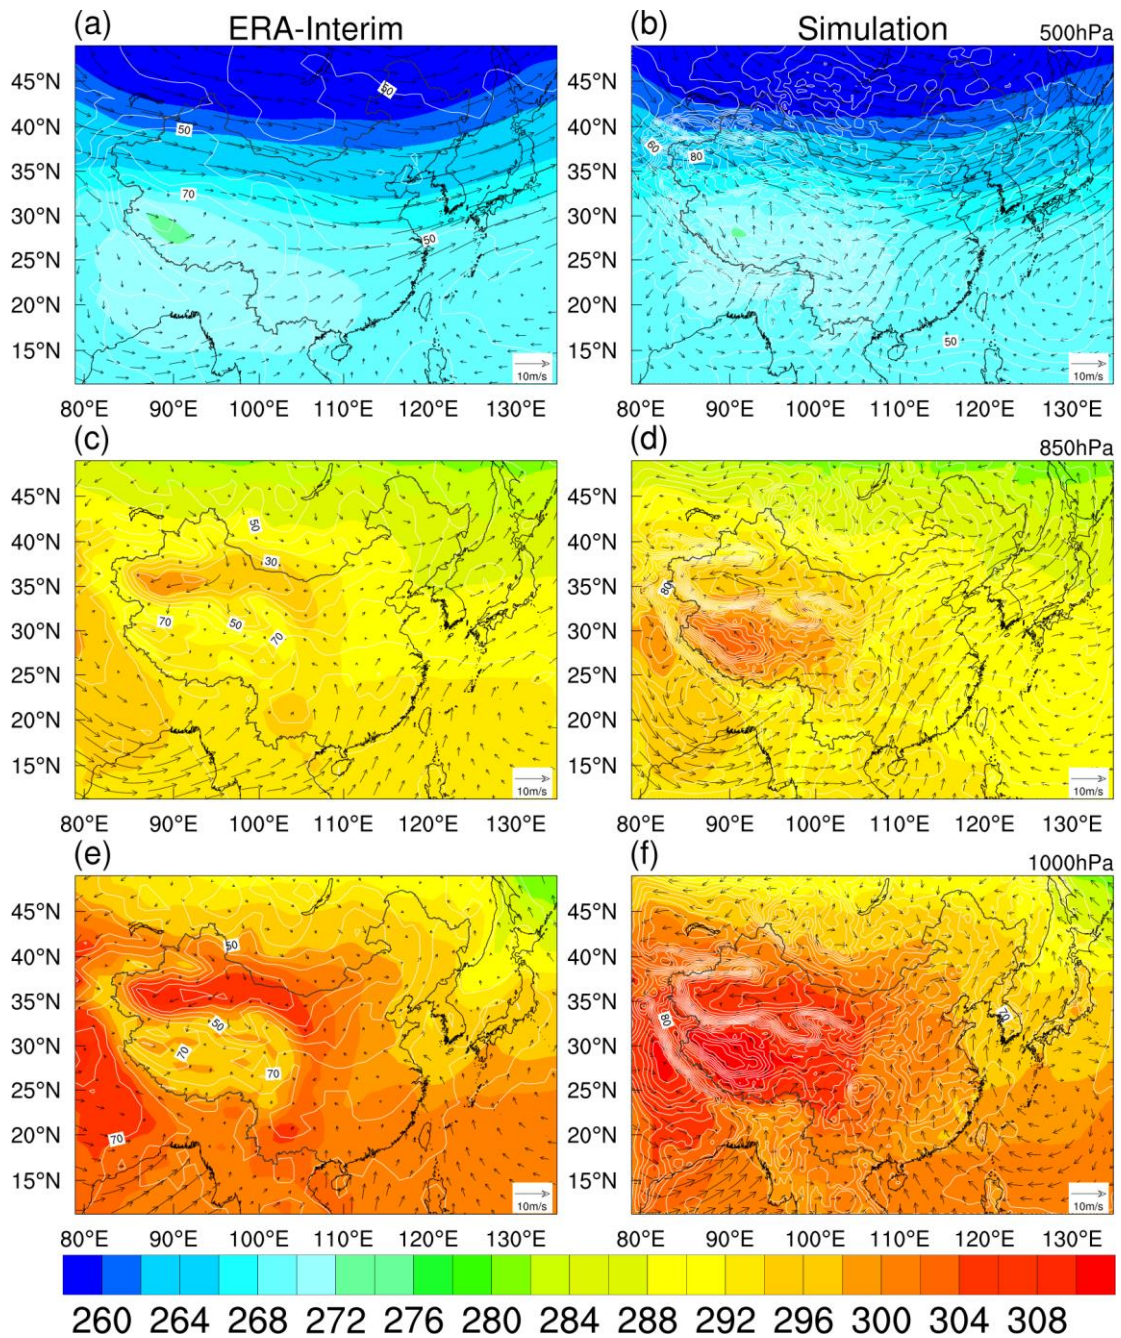

**Figure S2.** Comparisons between the simulated (a, c) and reanalysis (b, d) mean temperature (shading, units: K), wind (vectors, units: m/s), and relative humidity (contours, units: %) at 500 hPa (a, b), 850 hPa (c, d) and 1000 hPa (e, f) in 2016.

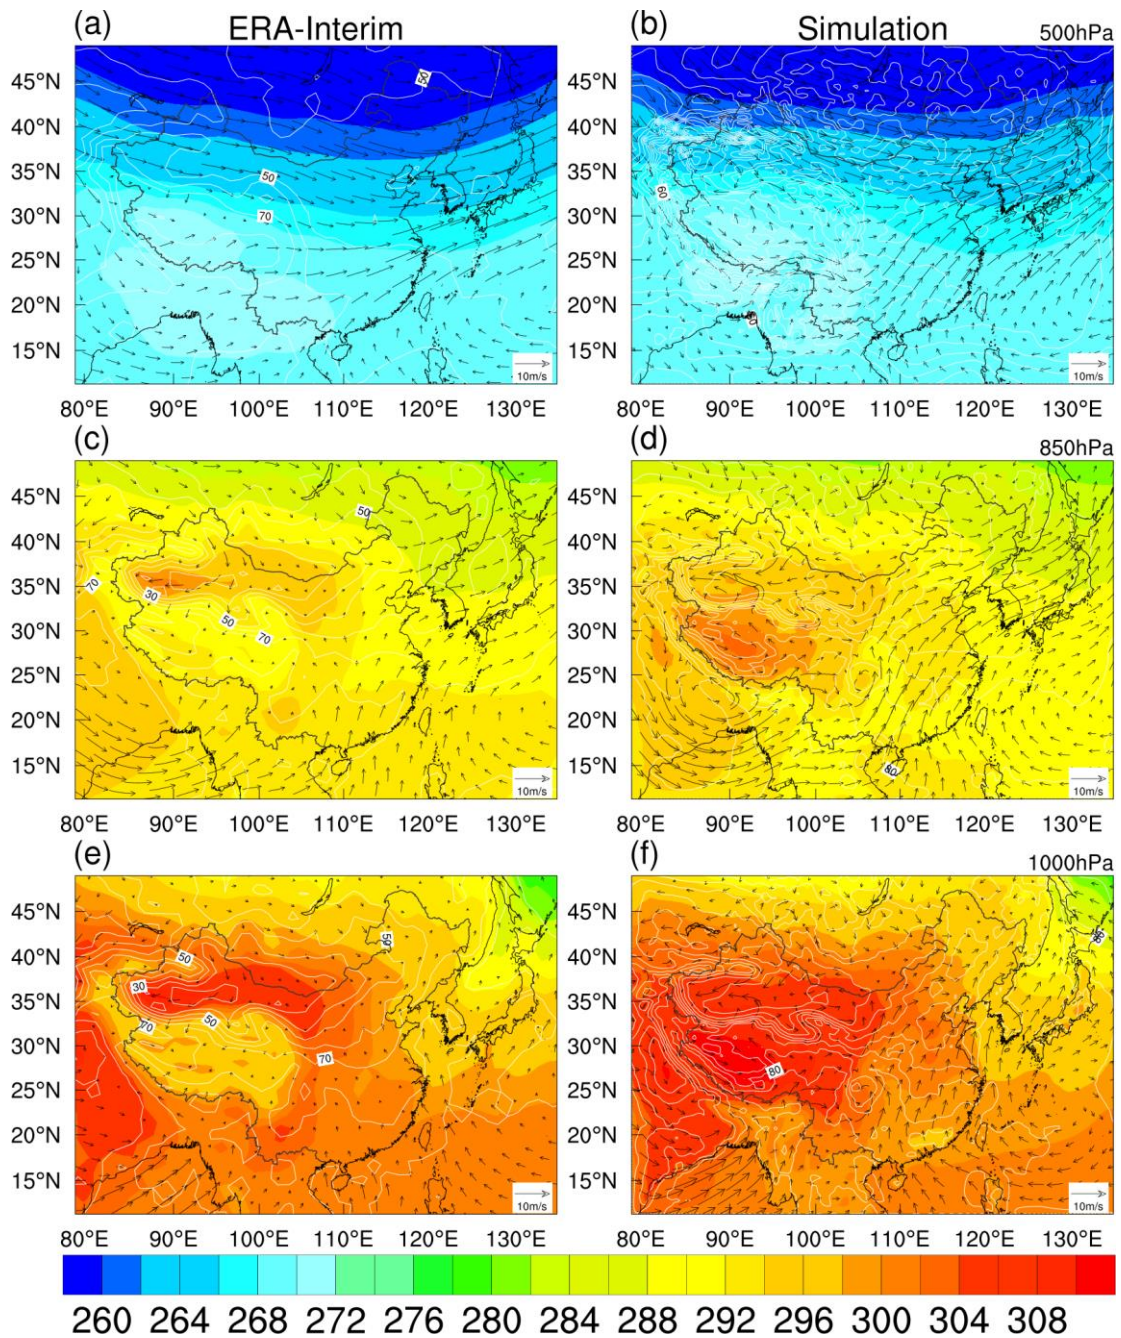

**Figure S3.** Comparisons between the simulated (a, c) and reanalysis (b, d) mean temperature (shading, units: K), wind (vectors, units: m/s), and relative humidity (contours, units: %) at 500 hPa (a, b), 850 hPa (c, d) and 1000 hPa (e, f) in 2017.

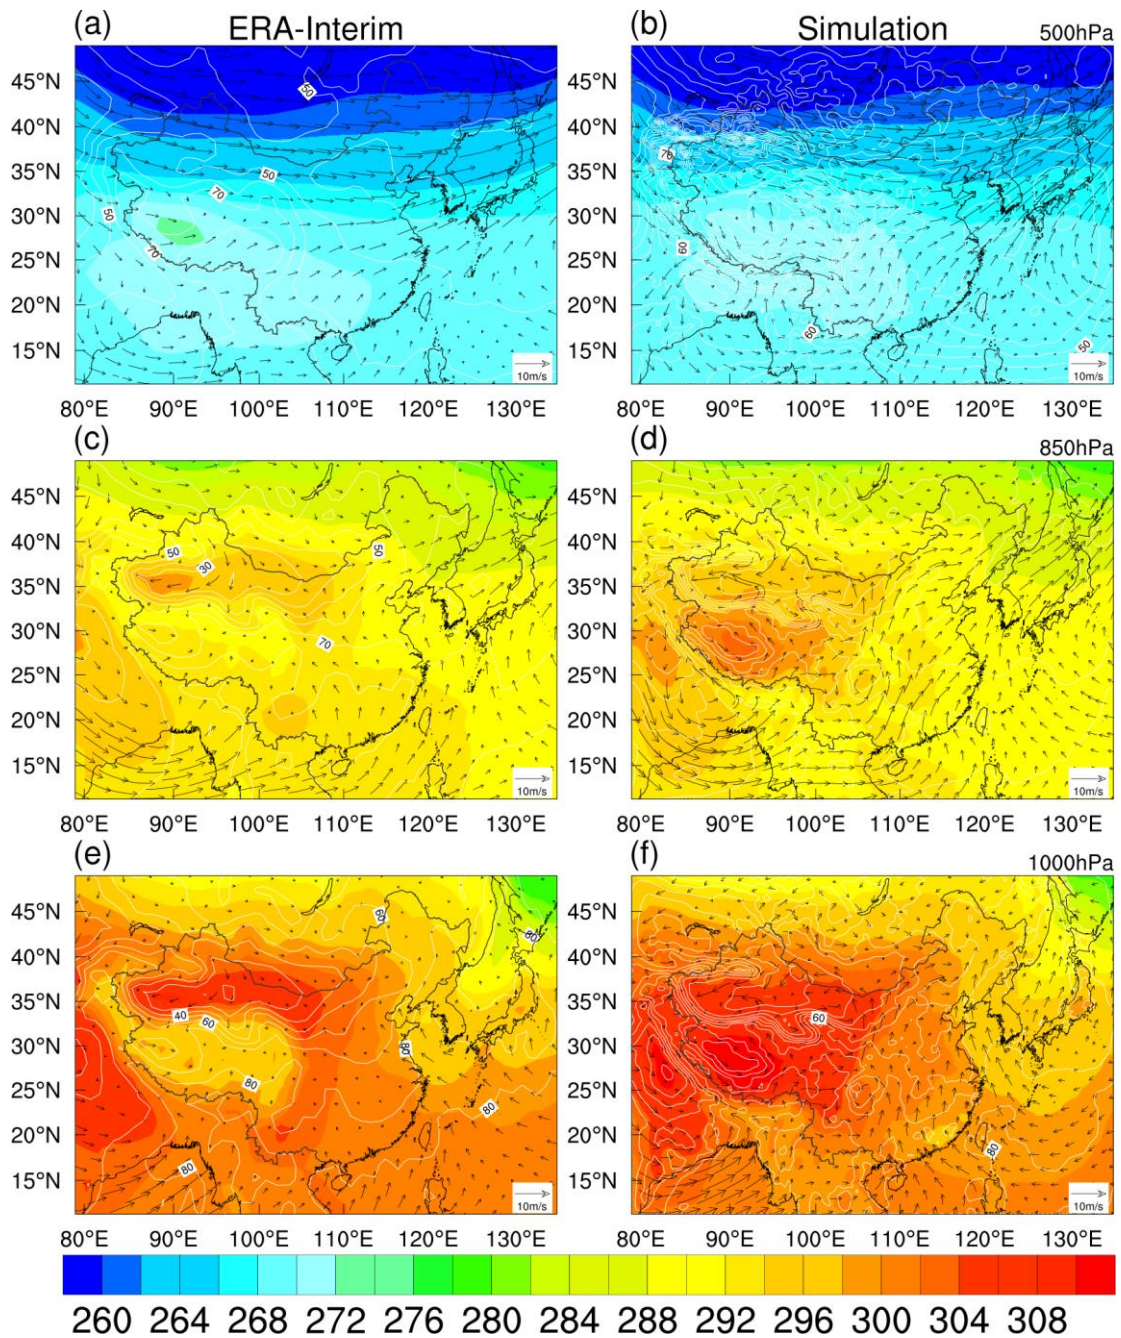

**Figure S4.** Comparisons between the simulated (a, c) and reanalysis (b, d) mean temperature (shading, units: K), wind (vectors, units: m/s), and relative humidity (contours, units: %) at 500 hPa (a, b), 850 hPa (c, d) and 1000 hPa (e, f) in 2018.

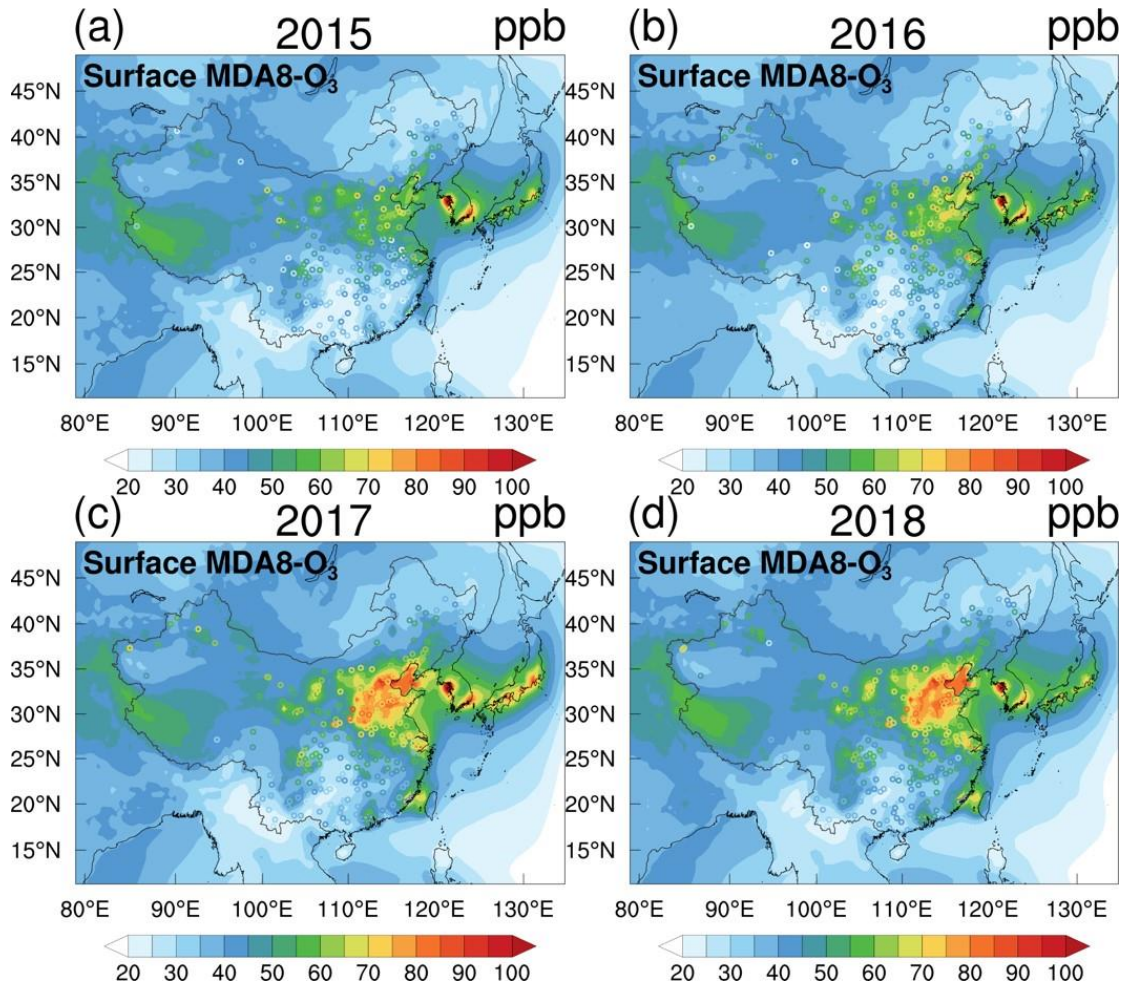

**Figure S5.** Comparisons between the simulated and observed surface MDA8 O<sub>3</sub> concentrations (units: ppb) during the summer monsoon period in (a)2015, (b)2016, (c)2017, (d)2018. Colored circles represent the observations.

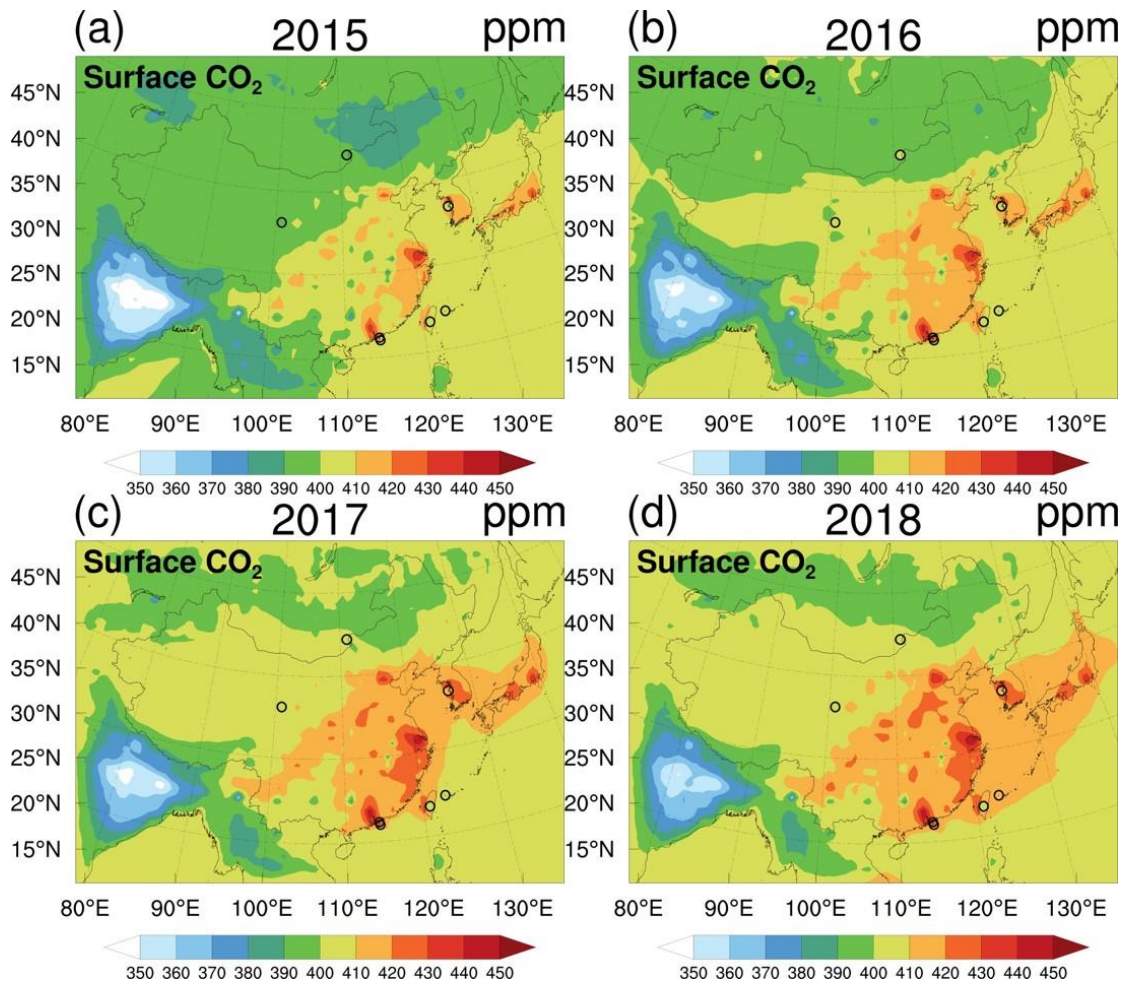

**Figure S6.** Comparisons between the simulated and observed surface CO<sub>2</sub> concentrations (units: ppm) during the summer monsoon period in (a)2015, (b)2016, (c)2017, (d)2018.

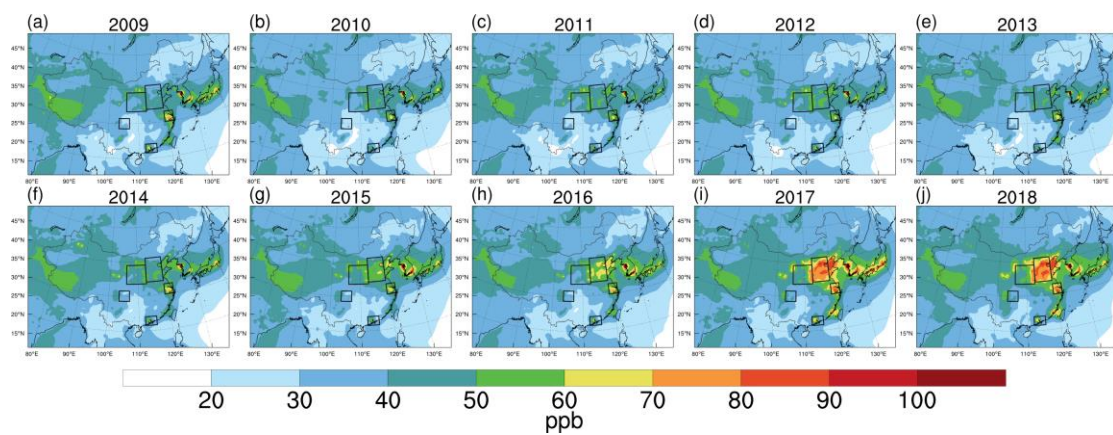

**Figure S7.** Simulated surface MDA8 O<sub>3</sub> concentrations (units: ppb) in the summer monsoon period of 2009 (a), 2010 (b), 2011 (c), 2012 (d), 2013 (e), 2014 (f), 2015 (g), 2016 (h), 2017 (i) and 2018 (j).

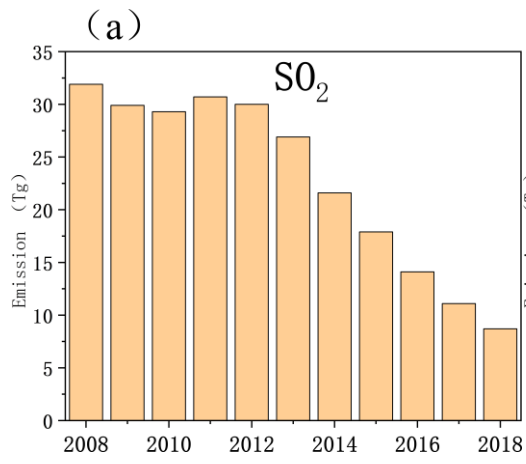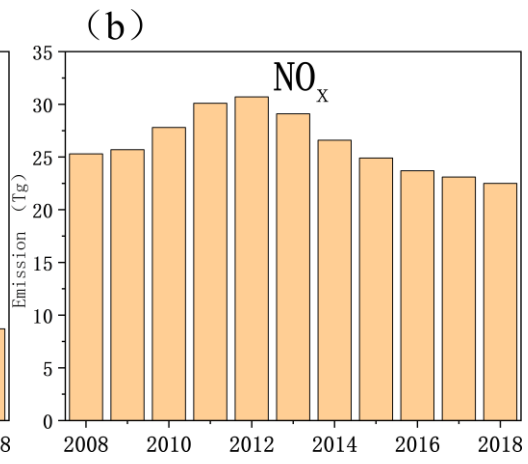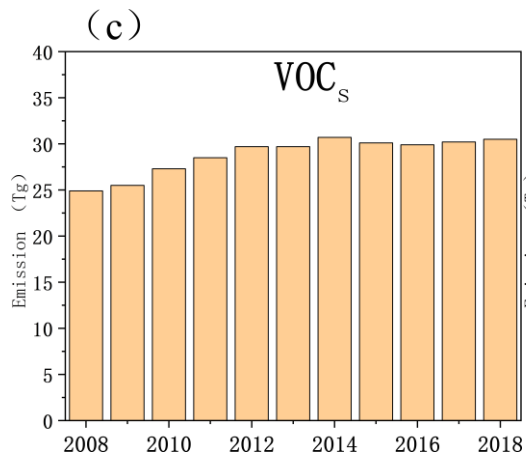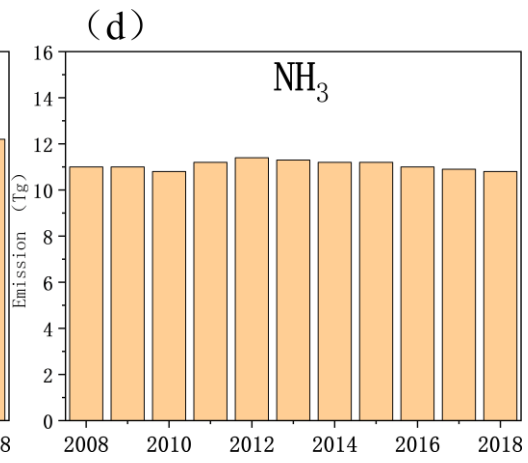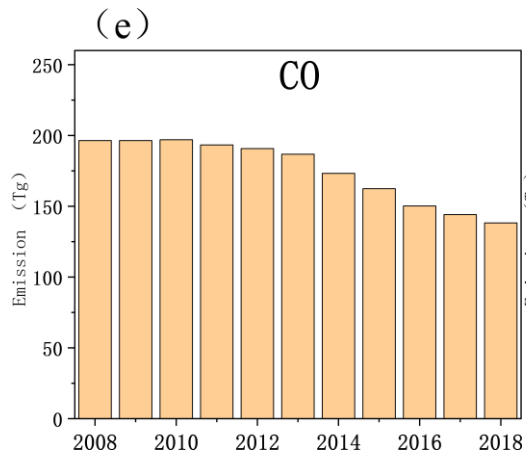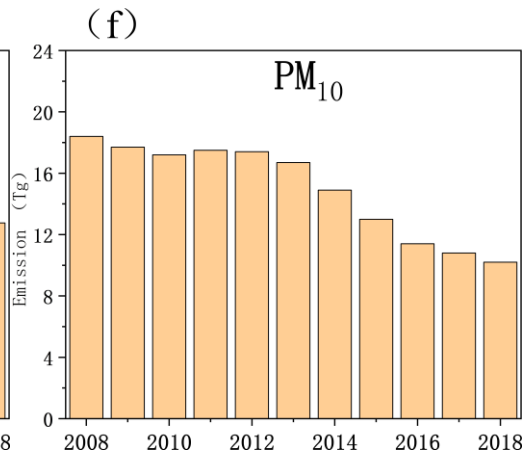



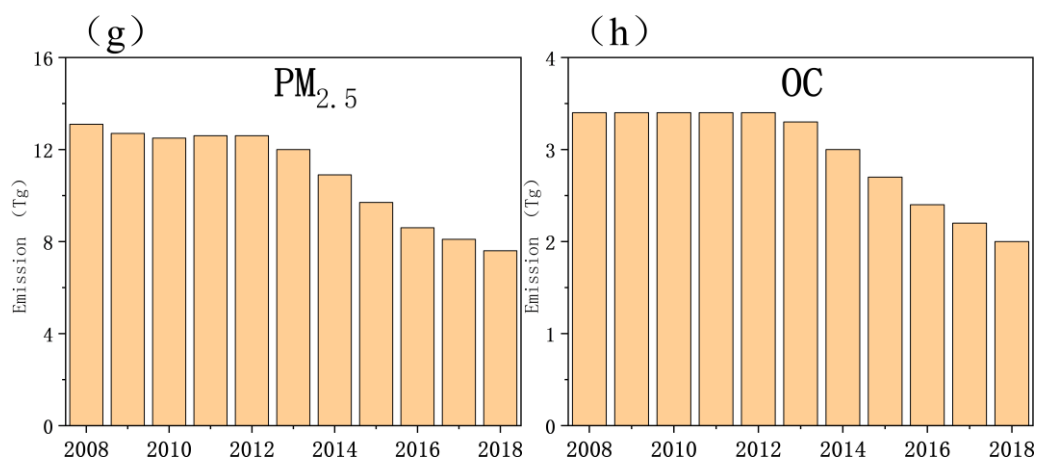

**Figure S8.** Changes in the anthropogenic emissions (Tg) from 2008 to 2018. The species include (a)SO<sub>2</sub>, (b)NO<sub>x</sub>, (c)VOCs, (d)NH<sub>3</sub>, (e)CO, (f)PM<sub>10</sub>, (g)PM<sub>2.5</sub>, (h)OC.

**Table S1.** Changes in the model domain's anthropogenic emissions (Tg) from 2008 to 2018

| Year | SO <sub>2</sub> | NO <sub>x</sub> | VOCs | NH <sub>3</sub> | CO    | PM <sub>10</sub> | PM <sub>2.5</sub> | OC  |
|------|-----------------|-----------------|------|-----------------|-------|------------------|-------------------|-----|
| 2008 | 31.9            | 25.3            | 24.9 | 11.0            | 196.4 | 18.4             | 13.1              | 3.4 |
| 2009 | 29.9            | 25.7            | 25.5 | 11.0            | 196.4 | 17.7             | 12.7              | 3.4 |
| 2010 | 29.3            | 27.8            | 27.3 | 10.8            | 197.0 | 17.2             | 12.5              | 3.4 |
| 2011 | 30.7            | 30.1            | 28.5 | 11.2            | 193.3 | 17.5             | 12.6              | 3.4 |
| 2012 | 30.0            | 30.7            | 29.7 | 11.4            | 190.7 | 17.4             | 12.6              | 3.4 |
| 2013 | 26.9            | 29.1            | 29.7 | 11.3            | 186.8 | 16.7             | 12.0              | 3.3 |
| 2014 | 21.6            | 26.6            | 30.7 | 11.2            | 173.2 | 14.9             | 10.9              | 3.0 |
| 2015 | 17.9            | 24.9            | 30.1 | 11.2            | 162.4 | 13.0             | 9.7               | 2.7 |
| 2016 | 14.1            | 23.7            | 29.9 | 11.0            | 150.2 | 11.4             | 8.6               | 2.4 |
| 2017 | 11.1            | 23.1            | 30.2 | 10.9            | 144.1 | 10.8             | 8.1               | 2.2 |
| 2018 | 8.7             | 22.5            | 30.5 | 10.8            | 138.2 | 10.2             | 7.6               | 2.0 |
